# Supplementary material for: Substrate-free copper nanoclusters exhibit super diamagnetism and surface based soft ferromagnetism
Source: Royal Society of Chemistry journal article supplement (doi:10.1039/c7nr07136a), 2017-01-01
Supplement: c7nr07136a1.pdf [file c7nr07136a1.pdf]

## Electronic Supplementary Information

### Substrate-free Copper Nanoclusters Exhibit Super Diamagnetism and Surface based Soft Ferromagnetism

Yuvaraja Raju<sup>a</sup>, Pattabiraman Krishnamurthi<sup>a</sup>, P. L. Paulose<sup>b</sup> and Periakaruppan T Manoharan<sup>a\*</sup>

<sup>a</sup>Department of Chemistry, Indian Institute of Technology/Madras, Chennai 600036, India

<sup>b</sup>Department of Condensed Matter Physics and Material Science, Tata Institute of Fundamental Research, Homi Bhabha Road, Colaba, Mumbai 400005, India

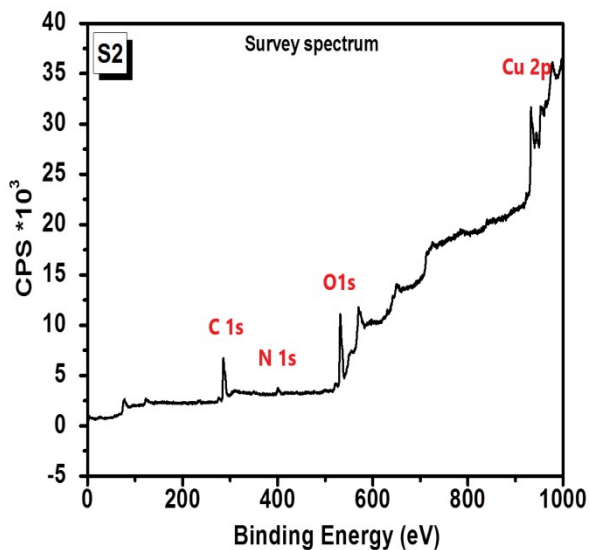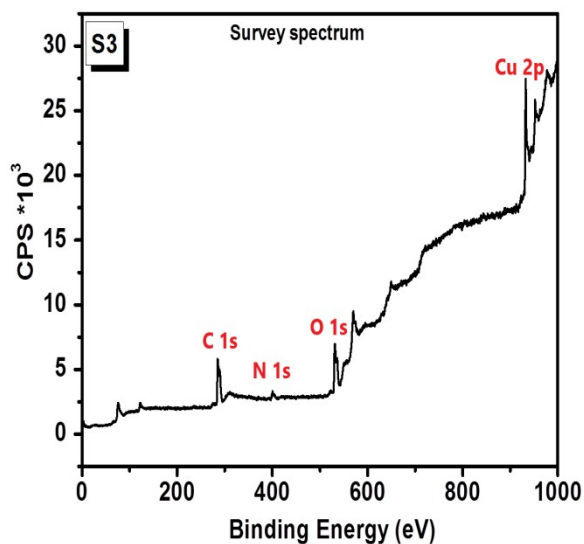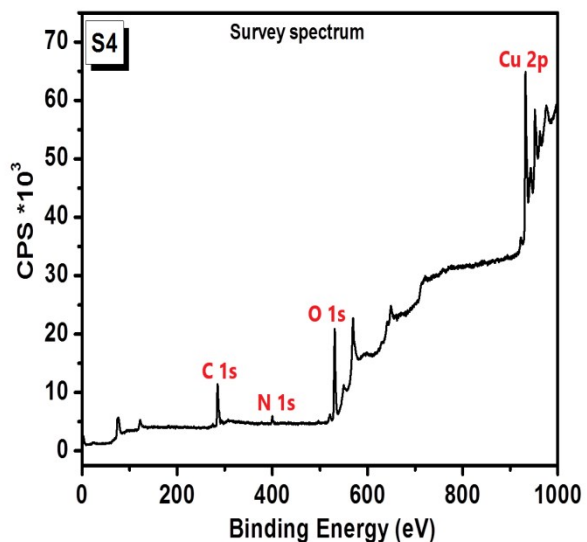

Fig. S1 XPS survey spectrum of S2, S3 and S4 samples.

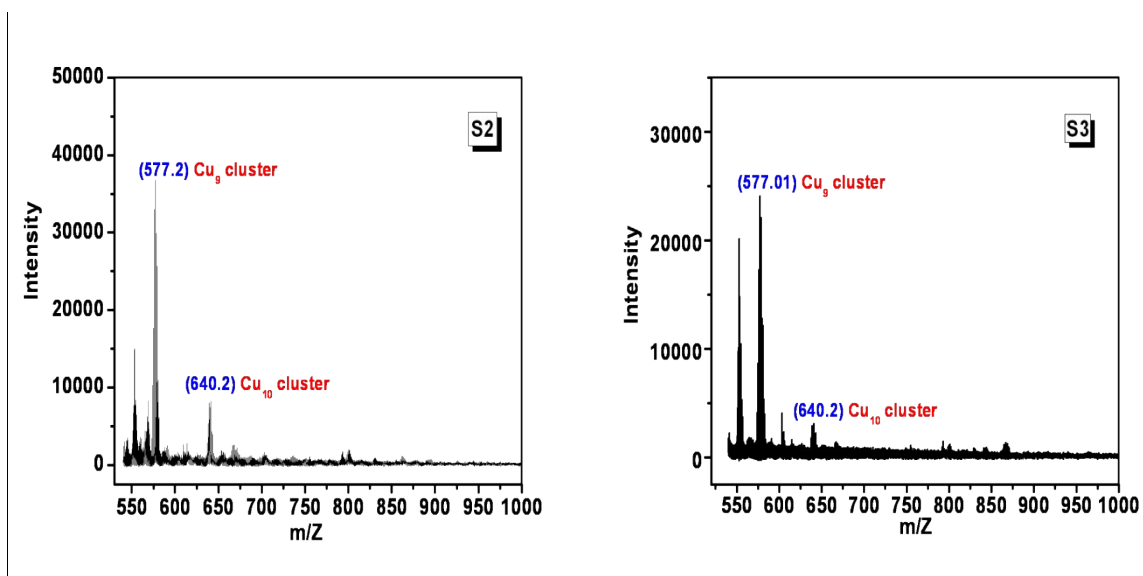

Fig. S2 MALDI-TOF survey spectrum of S2 and S3 sample.

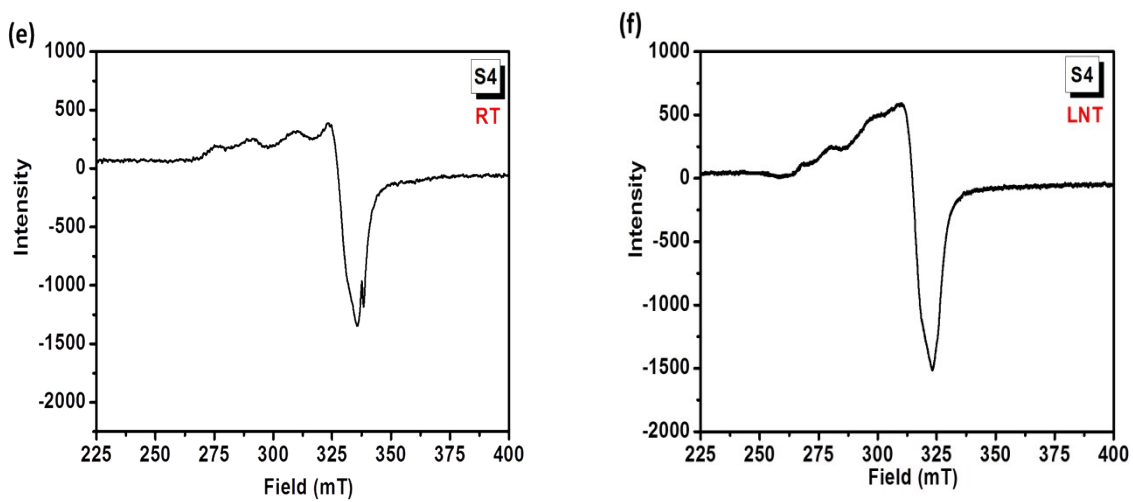

Fig. S3 ESR analysis of S4 sample at RT and LNT.

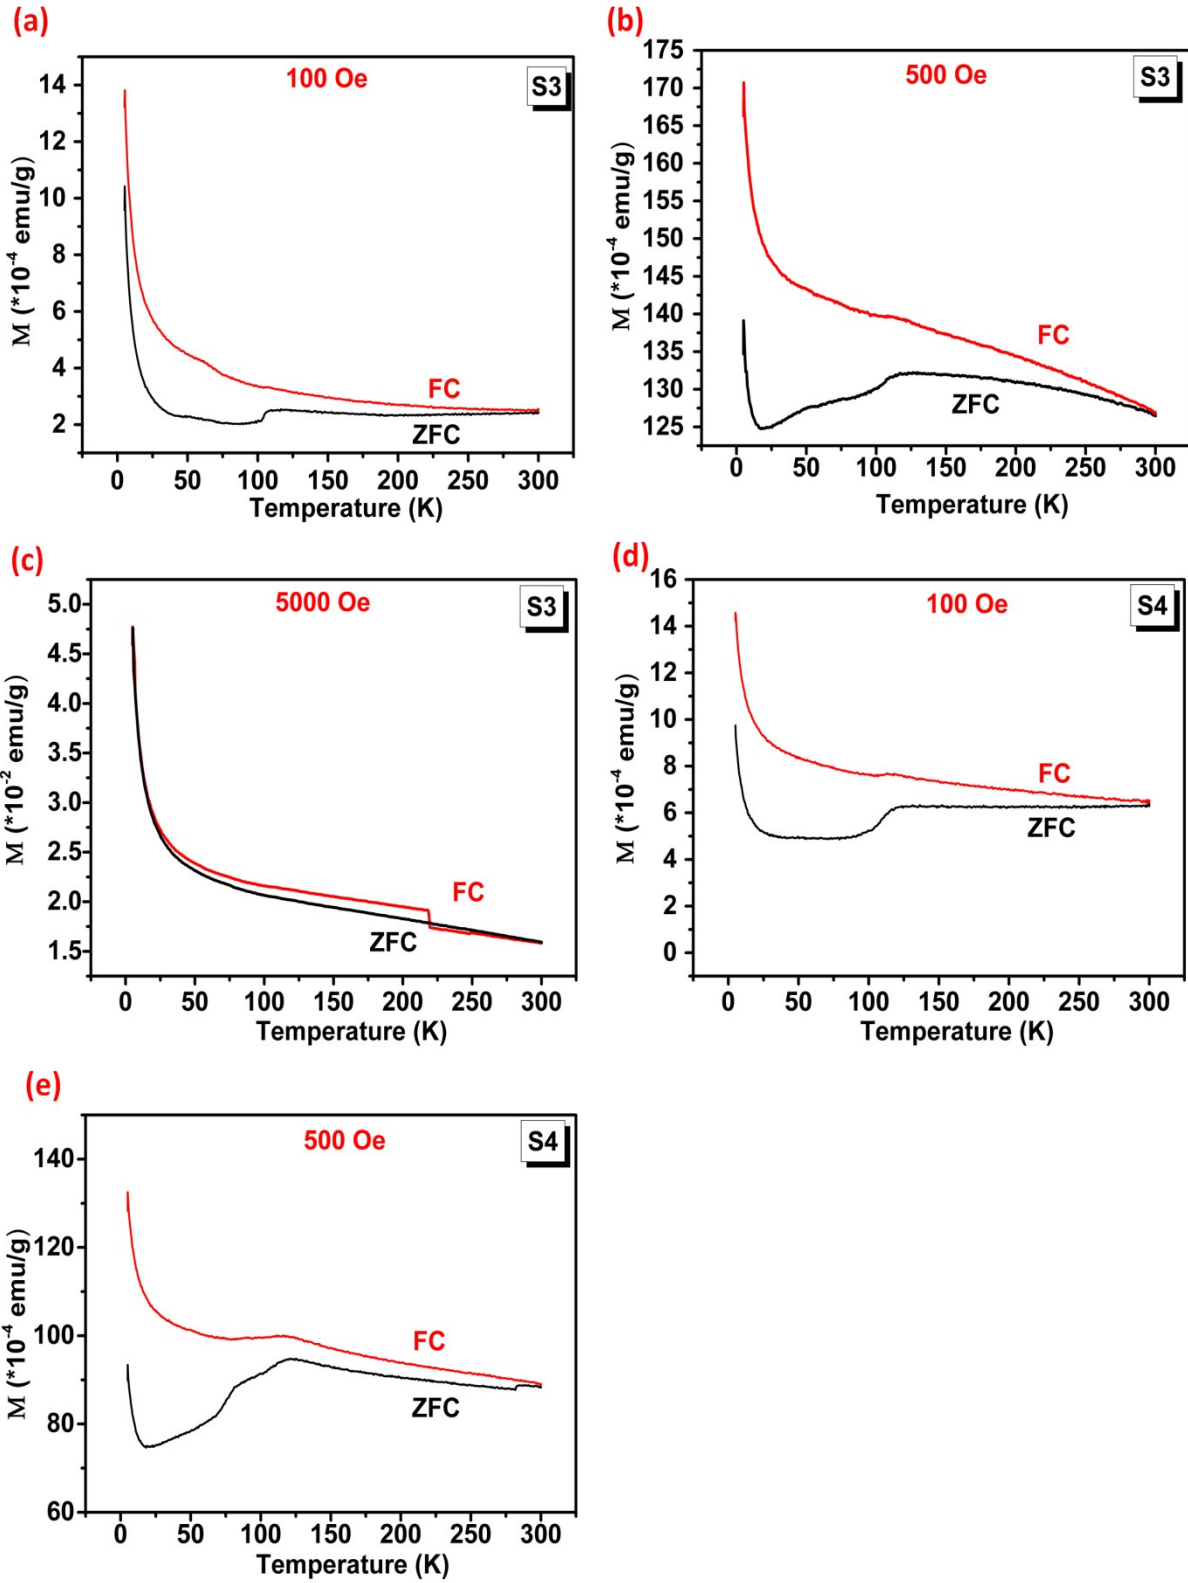

Fig. S4 Magnetic Susceptibility ( $\chi$ ) curves of S3 (a, b) and S4 (d,e) at 100 Oe and 500 Oe respectively and at 5000 Oe for S3 (c).

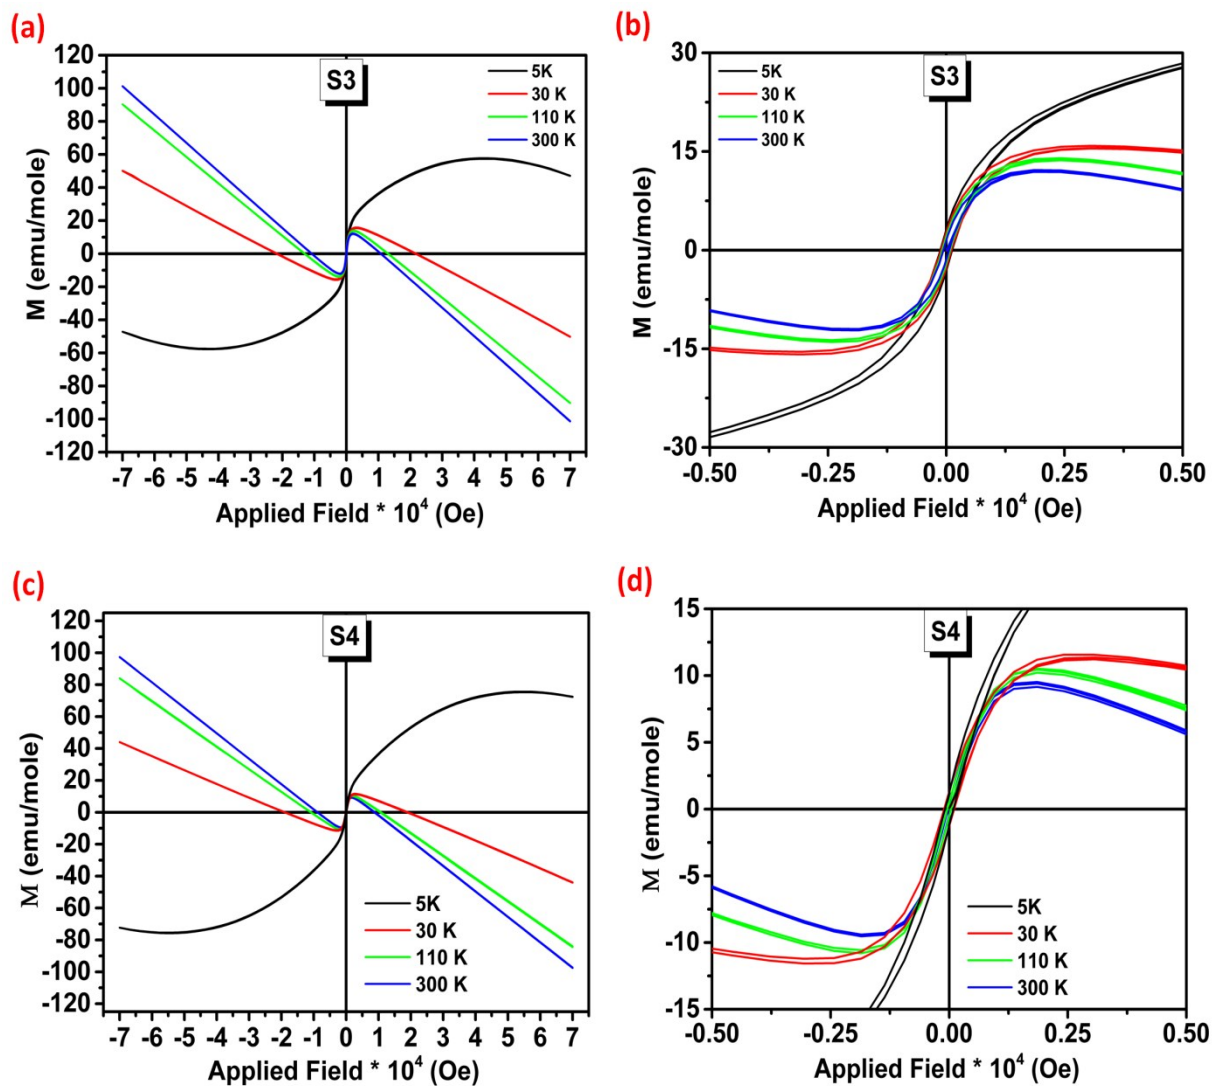

Fig. S5 Magnetization curves of S3 (a,b) and S4 (c,d) from -7 T to +7T and in the contracted field sweep of -0.5T to +0.5T. The latter is given only to emphasize the presence of both a ferromagnetic and a diamagnetic components.
